# Supplementary material
Source: publisher figshare collection journal article supplement (https://plos.figshare.com/articles/dataset/_/7741778)
Supplement: Supplementary file 1 [file 1]

Archive with 8 entries (8 files):
- pone.0212259.s001.pdf
- pone.0212259.s002.pdf
- pone.0212259.s003.pdf
- pone.0212259.s004.pdf
- pone.0212259.s005.pdf
- pone.0212259.s006.pdf
- pone.0212259.s007.pdf
- pone.0212259.s008.pdf
