# Supplementary material
Source: publisher figshare collection journal article supplement (https://plos.figshare.com/articles/dataset/_/7741778)
Supplement: Supplementary file 1 [file 1 › pone.0212259.s001.pdf]

| Drug                                                   | ATC code                              | Nordic article number                                                                                                                                                                                                                                                                         | Procedure codes |
|--------------------------------------------------------|---------------------------------------|-----------------------------------------------------------------------------------------------------------------------------------------------------------------------------------------------------------------------------------------------------------------------------------------------|-----------------|
| <b>Oral glucocorticoids</b>                            |                                       |                                                                                                                                                                                                                                                                                               |                 |
| Betamethasone                                          | H02AB01                               | 499590                                                                                                                                                                                                                                                                                        |                 |
| Dexamethasone                                          | H02AB02                               | 039413; 126955; 188988; 113331;<br>190108; 190132; 374319; 418122;<br>579043; 591445                                                                                                                                                                                                          |                 |
| Methylprednisolone                                     | H02AB04                               | 046557; 050487; 072601; 109119;<br>111245; 112671; 159103; 174284;<br>450619; 499772; 500074; 509125;<br>509133; 536422                                                                                                                                                                       |                 |
| Prednisolone                                           | H02AB06                               | 042448; 164118; 164130; 164141;<br>164153; 164164; 164175; 168548;<br>184382; 398747; 425905; 502076;<br>507660; 516005; 516013; 516021;<br>516039; 521930; 521948; 521955;<br>530899; 564513; 743542; 743559;<br>743567; 748756                                                              |                 |
| Prednisone                                             | H02AB07                               |                                                                                                                                                                                                                                                                                               |                 |
| Hydrocortisone                                         | H02AB09                               | 049319; 141569; 155579; 393735;<br>424199; 445320; 487361; 490667;<br>490667; 503581; 746628; 746636                                                                                                                                                                                          |                 |
| <b>Glucocorticoids by injection</b>                    |                                       |                                                                                                                                                                                                                                                                                               |                 |
| Betamethasone                                          | H02AB01                               | 006595; 006634; 013802; 013815;<br>013824; 013835; 034731; 038661;<br>042812; 058396; 123372; 131796;<br>143773; 145143; 177360; 181595;<br>192914; 192922; 194713; 385214;<br>399765; 413438; 473824; 477631;<br>483156; 488471; 498048; 504332;<br>523266; 556860                           |                 |
| Dexamethasone                                          | H02AB02                               | 053066; 057984; 421131; 570853;<br>570861                                                                                                                                                                                                                                                     |                 |
| Methylprednisolone                                     | H02AB04                               | 042093; 047663; 067283; 130683;<br>134940; 134965; 141044; 143339;<br>143347; 153928; 161075; 161637;<br>165613; 171016; 180299; 189506;<br>189522; 195389; 390762; 397856;<br>420151; 434274; 453162; 465187;<br>488496; 489011; 530391; 549923;<br>560425; 563956; 583158; 590659<br>189811 |                 |
| Prednisolone                                           | H02AB06                               |                                                                                                                                                                                                                                                                                               |                 |
| Triamcinolone                                          | H02AB08                               |                                                                                                                                                                                                                                                                                               |                 |
| <b>Locally-acting glucocorticoids</b>                  |                                       |                                                                                                                                                                                                                                                                                               |                 |
| Beclomethasone (inhaled)                               | R03BA01; R03AK08                      |                                                                                                                                                                                                                                                                                               |                 |
| Budesonide (inhaled)                                   | R03BA02; R03AK07                      |                                                                                                                                                                                                                                                                                               |                 |
| Flunisolide (inhaled)                                  | R03BA03                               |                                                                                                                                                                                                                                                                                               |                 |
| Fluticasone (inhaled)                                  | R03BA05; R03AK06;<br>R03AK10; R03AK11 |                                                                                                                                                                                                                                                                                               |                 |
| Mometasone (inhaled)                                   | R03BA07                               |                                                                                                                                                                                                                                                                                               |                 |
| Ciclesonide                                            | R03BA08                               |                                                                                                                                                                                                                                                                                               |                 |
| Prednisolone (acting on the intestine)                 | A07EA01                               |                                                                                                                                                                                                                                                                                               |                 |
| Hydrocortisone (acting on the intestine)               | A07EA02                               |                                                                                                                                                                                                                                                                                               |                 |
| Budesonide (acting on the intestine)                   | A07EA06                               |                                                                                                                                                                                                                                                                                               |                 |
| Various glucocorticoids for hemorrhoids                | C05AA                                 |                                                                                                                                                                                                                                                                                               |                 |
| Prednisolone (suppositories)                           | H02AB06                               | 685546                                                                                                                                                                                                                                                                                        |                 |
| Glucocorticoids for skin conditions                    | D07                                   |                                                                                                                                                                                                                                                                                               |                 |
| <b>Treatments for IBD besides oral glucocorticoids</b> |                                       |                                                                                                                                                                                                                                                                                               |                 |
| Hydrocortisone (acting on the intestine)               | A07EA02                               |                                                                                                                                                                                                                                                                                               |                 |
| Budesonide                                             | A07EA06                               |                                                                                                                                                                                                                                                                                               |                 |
| Azathioprin                                            | L04AX01                               |                                                                                                                                                                                                                                                                                               |                 |
| Methotrexate                                           | L01BA01, L04AX03                      |                                                                                                                                                                                                                                                                                               | BWHA115         |
| Mesalazin                                              | A07EC02                               |                                                                                                                                                                                                                                                                                               |                 |
| Sulfasalazine                                          | A07EC01                               |                                                                                                                                                                                                                                                                                               |                 |
| Infliximab                                             | L04AB02                               |                                                                                                                                                                                                                                                                                               | BOHJ18A1        |
| Adalimumab                                             | L04AB04                               |                                                                                                                                                                                                                                                                                               | BOHJ18A3        |
| Vedolizumab                                            | L04AA33                               |                                                                                                                                                                                                                                                                                               | BOHJ19H4        |
| Ustekinumab                                            | L04AC05                               |                                                                                                                                                                                                                                                                                               | BOHJ18B3        |
| Golinumab                                              | L04AB06                               |                                                                                                                                                                                                                                                                                               | BOHJ18A4        |

**Other medications**

Insulin

A10A

Sulfonylureas

A10BB

**Antibiotics**J01

---
