# Supplementary material
Source: publisher figshare collection journal article supplement (https://plos.figshare.com/articles/dataset/_/7741778)
Supplement: Supplementary file 1 [file 1 › pone.0212259.s002.pdf]

| Diagnoses                               | ICD-10 codes |
|-----------------------------------------|--------------|
| Syncope                                 | R55          |
| Hyponatraemia                           | E871         |
| Hypotension                             | I95          |
| Cardiovascular collapse                 |              |
| Cardiogenic shock or                    | R570         |
| Hypovolemic shock                       | R571         |
| Gastrointestinal symptoms               |              |
| Nausea/vomiting                         | R11          |
| Abdominal pain                          | R10          |
| Diarrhea                                | K529B        |
| Obstipation                             | K590         |
| Hypoglycaemia                           | E15 E162     |
| Treatment-induced adrenal insufficiency | E273         |
| Erysipelas (negative outcome)           | A46          |
