# Supplementary material
Source: publisher figshare collection journal article supplement (https://plos.figshare.com/articles/dataset/_/7741778)
Supplement: Supplementary file 1 [file 1 › pone.0212259.s003.pdf]

| Disease                                      | ICD-10                                                                                                                                  | ICD-8                                                            |
|----------------------------------------------|-----------------------------------------------------------------------------------------------------------------------------------------|------------------------------------------------------------------|
| <b>Pulmonary diseases</b>                    |                                                                                                                                         |                                                                  |
| Asthma                                       | J45, J46                                                                                                                                | 493                                                              |
| Chronic obstructive pulmonary disease        | J41, J42, J43, J44                                                                                                                      | 491, 492                                                         |
| <b>Rheumatic diseases</b>                    |                                                                                                                                         |                                                                  |
| Polymyalgia rheumatica/ Giant cell arthritis | M315, M316, M35.3                                                                                                                       | 446.30, 446.31, 446.39                                           |
| Rheumatoid arthritis                         | M05, M06                                                                                                                                | 712.19, 712.29, 712.39, 712.59                                   |
| Psoriasis arthritis                          | M07.0-M07.3                                                                                                                             | 696.09                                                           |
| Ankylosing spondylitis                       | M45                                                                                                                                     | 712.49                                                           |
| Other rheumatic diseases                     | L94.0, L94.1 (Sclerodermia)                                                                                                             | 734.00, 734.02, 734.03, 734.04 734.08,                           |
|                                              | M35.1 (mixed connective disease) M34.0-9                                                                                                | 734.09 (Sclerodermia) 695.49 (LE), 734.19                        |
|                                              | (LE), M32, G73.7C, N08.5A, N16.4B (SLE),                                                                                                | (SLE) 716.09, 716.19                                             |
|                                              | M33 (polymyositis/dermatomyositis). M35.0,                                                                                              | (polymyositis/dermatomyositis), 734.90                           |
|                                              | G73.7A (Sjögren's syndrome)                                                                                                             | (Sjögren's syndrome)                                             |
|                                              | M30.0 (Polyarteritis nodosa)                                                                                                            | 446.29 (Wegener's granulomatosis) 287.09                         |
|                                              | M31.3 (Wegener's granulomatosis) D69.0B,                                                                                                | (Schonlein henochs purpura)                                      |
|                                              | M31.0B (Schonlein henochs purpura)                                                                                                      | 446.09 (Vasculitis/arthritis)                                    |
|                                              | I77.6, DL95 (Vasculitis/arthritis)                                                                                                      |                                                                  |
| <b>Gastrointestinal diseases</b>             |                                                                                                                                         |                                                                  |
| Crohn's disease                              | K500-509                                                                                                                                | 563.01, 563.02, 563.09                                           |
| Ulcerative colitis                           | K510-519                                                                                                                                | 563.19                                                           |
| Unclassified IBD                             | K519, DK529                                                                                                                             |                                                                  |
| <b>Cancer</b>                                | C00-97                                                                                                                                  | 140-209                                                          |
| <b>Dermatological diseases</b> Pemphigus /   | L10.0, L10.2, L10.4, L12.0, L13.0, L00,                                                                                                 | 694 , 693.00, 693.08, 693.09, 684.00                             |
| pemphigoid dermatitis herpetiformis          | L51.2, L11, L13,14                                                                                                                      |                                                                  |
| Bullous disorders                            |                                                                                                                                         |                                                                  |
| <b>Renal diseases</b>                        | N00, N01, N03, N04, N05 N06, N07, N08, N11, N14, N15, N16, N18, N19, N26, N27, I12. I13, I15.0, I15.1, E10.2, E11.2, E14.2, Q61.1-Q61.4 | 249.02, 250.02, 403, 404, 580-584, 590.09, 593.20, 753.10-753.19 |
| <b>Other autoimmune diseases</b>             | D59.0                                                                                                                                   | 283.90                                                           |
|                                              | D59.1 (autoimmune hemolytic anemia)                                                                                                     | 283.91 (autoimmune hemolytic anemia)                             |
|                                              | D69.3 (Idiopathic thrombocytopenic purpura)                                                                                             | 287.10 (Idiopathic thrombocytopenic purpura)                     |
|                                              | K75.4 (autoimmune hepatitis)                                                                                                            | 571.93 (autoimmune hepatitis)                                    |
| <b>Neurological diseases</b>                 |                                                                                                                                         |                                                                  |
| Multiple sclerosis                           | G35                                                                                                                                     | 340                                                              |
| <b>Adrenal insufficiency</b>                 | E230, E240, E271, E272, E274, E893                                                                                                      | 253, 25510, 25511                                                |
