# Supplementary material
Source: publisher figshare collection journal article supplement (https://plos.figshare.com/articles/dataset/_/7741778)
Supplement: Supplementary file 1 [file 1 › pone.0212259.s004.pdf]

|                    | Equivalent glucocorticoid dose | Prednisolone conversion factor |
|--------------------|--------------------------------|--------------------------------|
| Cortisone          | 25                             | 0.2                            |
| Cortisol           | 20                             | 0.25                           |
| Methylprednisolone | 4                              | 1.25                           |
| Prednisolone       | 5                              | 1                              |
| Prednisone         | 5                              | 1                              |
| Triamcinolone      | 4                              | 1.25                           |
| Dexamethasone      | 0.75                           | 6.67                           |
| Betamethasone      | 0.6                            | 8.33                           |

*Cumulative dose calculation:*

The cumulative dose was calculated by multiplying the number of pills, dose per pill, and prednisolone conversion factor for each prescription and then adding them up across all prescriptions.
