# Supplementary material
Source: publisher figshare collection journal article supplement (https://plos.figshare.com/articles/dataset/_/7741778)
Supplement: Supplementary file 1 [file 1 › pone.0212259.s005.pdf]

| Number of admissions in risk period 0-4 per person | Number (%)  |
|----------------------------------------------------|-------------|
| Persons with any admission                         | 9,058 (100) |
| Persons with only 1 admission in total             | 7,517 (83)  |
| Persons with 2 admissions in total                 | 1,158 (13)  |
| Persons with 3 admissions in total                 | 260 (2.9)   |
| Persons with 4 admissions in total                 | 68 (0.75)   |
| Persons with 5 admissions in total                 | 30 (0.33)   |
| Persons with 6 admissions in total                 | 14 (0.15)   |
| Persons with $\geq 7$ admissions in total          | 11 (0.12)   |
