# Supplementary material
Source: publisher figshare collection journal article supplement (https://plos.figshare.com/articles/dataset/_/7741778)
Supplement: Supplementary file 1 [file 1 › pone.0212259.s006.pdf]

|                  | IRR and (95% CI) |                   |                 |                              |                 |
|------------------|------------------|-------------------|-----------------|------------------------------|-----------------|
|                  | Syncope          | Hypo-<br>natremia | Hypotension     | Gastrointestinal<br>symptoms | Hypoglycemia    |
| Number of cases  | 3,527            | 629               | 292             | 6,220                        | 37              |
| Reference period | 1                | 1                 | 1               | 1                            | 1               |
| Risk period 0    | 0.8 (0.7 - 0.9)  | 0.7 (0.6 - 1.0)   | 1.5 (0.9 - 2.5) | 1.0 (0.9 - 1.1)              | 0.7 (0.2 - 2.2) |
| Risk period 1    | 1.0 (0.9 - 1.2)  | 1.4 (1.1 - 2.0)   | 2.3 (1.3 - 4.1) | 1.6 (1.5 - 1.8)              | 2.2 (0.7 - 7.3) |
| Risk period 2    | 1.0 (0.8 - 1.1)  | 1.1 (0.7 - 1.5)   | 2.2 (1.2 - 4.1) | 1.8 (1.6 - 2.0)              | 1.9 (0.5 - 7.9) |
| Risk period 3    | 1.0 (0.8 - 1.1)  | 0.9 (0.6 - 1.4)   | 1.9 (1.0 - 3.8) | 1.4 (1.3 - 1.6)              | NA              |
| Risk period 4    | 0.8 (0.7 - 1.0)  | 0.7 (0.4 - 1.1)   | 1.7 (0.8 - 3.5) | 1.4 (1.3 - 1.7)              | 0.9 (0.1 - 8.5) |
