# Supplementary material
Source: publisher figshare collection journal article supplement (https://plos.figshare.com/articles/dataset/_/7741778)
Supplement: Supplementary file 1 [file 1 › pone.0212259.s007.pdf]

|                  | IRR and (95% CI) |                   |                 |                               |                 |
|------------------|------------------|-------------------|-----------------|-------------------------------|-----------------|
|                  | Syncope          | Hypo-<br>natremia | Hypotension     | Gastro intestinal<br>symptoms | Hypoglycemia    |
| Number of cases  | 2,367            | 376               | 192             | 3,904                         | 28              |
| Reference period | 1                | 1                 | 1               | 1                             | 1               |
| Risk period 0    | 0.8 (0.7 - 0.9)  | 0.7 (0.5 - 1.0)   | 1.2 (0.7 - 2.1) | 1.0 (0.9 - 1.1)               | 0.8 (0.2 - 3.1) |
| Risk period 1    | 1.0 (0.8 - 1.2)  | 1.1 (0.7 - 1.6)   | 2.2 (1.2 - 4.1) | 1.6 (1.4 - 1.8)               | 1.9 (0.5 - 8.0) |
| Risk period 2    | 0.9 (0.8 - 1.1)  | 0.7 (0.4 - 1.2)   | 1.2 (0.6 - 2.5) | 1.7 (1.5 - 2.0)               | 3.0 (0.6 - 15)  |
| Risk period 3    | 1.0 (0.8 - 1.2)  | 0.7 (0.4 - 1.2)   | 1.3 (0.6 - 2.9) | 1.2 (1.0 - 1.5)               | NA              |
| Risk period 4    | 0.8 (0.6 - 1.0)  | 0.6 (0.3 - 1.1)   | 1.6 (0.7 - 3.7) | 1.3 (1.1 - 1.6)               | 1.3 (0.1 - 14)  |
