# Supplementary material
Source: publisher figshare collection journal article supplement (https://plos.figshare.com/articles/dataset/_/7741778)
Supplement: Supplementary file 1 [file 1 › pone.0212259.s008.pdf]

|                                       | IRR and 95% CI  |                   |                 |                              |                 |
|---------------------------------------|-----------------|-------------------|-----------------|------------------------------|-----------------|
|                                       | Syncope         | Hypo-<br>natremia | Hypotension     | Gastrointestinal<br>symptoms | Hypoglycemia    |
| Reference period                      | 1               | 1                 | 1               | 1                            | 1               |
| <b>Cumulative dose<br/>&lt; 0.5 g</b> |                 |                   |                 |                              |                 |
| Cases                                 | 87              | 16                | 6               | 179                          | 0               |
| Risk period 0                         | 1.1 (0.5 – 3.5) | 2.0 (0.4 – 9.8)   | NA              | 0.7 (0.4 – 1.4)              | NA              |
| Risk period 1                         | 1.3 (0.5 – 3.1) | 1.1 (0.1 – 11)    | NA              | 0.8 (0.4 – 1.6)              | NA              |
| Risk period 2                         | 0.9 (0.4 – 1.8) | 0.3 (0.03 – 3.2)  | NA              | 1.2 (0.8 – 1.9)              | NA              |
| Risk period 3                         | 1.1 (0.6 – 3.5) | 2.5 (0.6 – 9.6)   | NA              | 1.2 (0.7 – 1.9)              | NA              |
| Risk period 4                         | 1.7 (0.8 – 3.5) | 0.5 (0.04 – 4.8)  | NA              | 1.8 (1.1 – 2.9)              | NA              |
| <b>Cumulative dose<br/>0.5-5 g</b>    |                 |                   |                 |                              |                 |
| Cases                                 | 1,432           | 263               | 117             | 2,501                        | 15              |
| Risk period 0                         | 0.8 (0.7 – 0.9) | 0.8 (0.6 – 1.2)   | 1.2 (0.6 – 2.4) | 1.1 (1.0 – 1.3)              | 0.4 (0.1 – 1.8) |
| Risk period 1                         | 1.0 (0.9 – 1.3) | 1.3 (0.9 – 2.0)   | 2.2 (1.1 – 4.4) | 1.7 (1.5 – 2.0)              | 0.7 (0.1 – 4.3) |
| Risk period 2                         | 1.0 (0.8 – 1.2) | 0.9 (0.6 – 1.5)   | 2.6 (1.3 – 5.4) | 1.9 (1.7 – 2.3)              | 1.1 (0.2 – 6.7) |
| Risk period 3                         | 1.0 (0.8 – 1.2) | 0.7 (0.4 – 1.2)   | 2.0 (0.9 – 4.4) | 1.5 (1.3 – 1.8)              | NA              |
| Risk period 4                         | 0.8 (0.6 – 1.0) | 0.6 (0.3 – 1.1)   | 0.9 (0.3 – 2.7) | 1.5 (1.2 – 1.8)              | NA              |
| <b>Cumulative dose<br/>&gt; 5 g</b>   |                 |                   |                 |                              |                 |
| Cases                                 | 2,049           | 355               | 172             | 3,652                        | 23              |
| Risk period 0                         | 0.8 (0.7 – 1.0) | 0.7 (0.5 – 1.0)   | 1.8 (0.8 – 4.2) | 1.0 (0.9 – 1.1)              | 1.4 (0.2 – 12)  |
| Risk period 1                         | 1.1 (0.9 – 1.3) | 1.8 (1.1 – 2.8)   | 3.2 (1.3 – 8.2) | 1.8 (1.6 – 2.1)              | 6.7 (0.8 – 56)  |
| Risk period 2                         | 1.1 (0.8 – 1.4) | 1.4 (0.8 – 2.5)   | 1.4 (0.4 – 5.1) | 2.1 (1.8 – 2.5)              | 7.0 (0.7 – 71)  |
| Risk period 3                         | 1.0 (0.7 – 1.4) | 1.2 (0.6 – 2.5)   | 2.6 (0.8 – 8.7) | 1.5 (1.1 – 1.9)              | NA              |
| Risk period 4                         | 0.8 (0.6 – 1.2) | 0.7 (0.3 – 1.9)   | 4.2 (1.3 – 14)  | 1.4 (1.1 – 1.9)              | 7.0 (0.4 – 129) |
